# Supplementary material for: The effect of π-stacking and H-bonding on ionization energies of a nucleobase: uracil dimer cation
Source: Royal Society of Chemistry journal article supplement (doi:10.1039/b817284f), 2009-01-01
Supplement: b817284f.pdf [file b817284f.pdf]

Electronic Supplementary Material for PCCP  
This journal is © The Owner Societies 2009

Uracil

E(NN)=358.335960, E(HF/6-31(+) $G^*$ )=-412.480723, E(CCSD/6-31(+) $G^*$ )=-413.683919

|   |           |           |          |
|---|-----------|-----------|----------|
| C | 1.282409  | 0.344117  | 0.000000 |
| O | 2.305402  | 1.000355  | 0.000000 |
| N | 0.034953  | 0.973561  | 0.000000 |
| C | -1.214176 | 0.400371  | 0.000000 |
| N | -1.169168 | -0.978725 | 0.000000 |
| C | -0.007293 | -1.695619 | 0.000000 |
| C | 1.195482  | -1.099235 | 0.000000 |
| H | 2.102515  | -1.668441 | 0.000000 |
| H | -0.122433 | -2.764793 | 0.000000 |
| H | -2.063639 | -1.435070 | 0.000000 |
| O | -2.250828 | 1.027713  | 0.000000 |
| H | 0.047936  | 1.982097  | 0.000000 |

Stacked uracil dimer, the geometry of the neutral

E(NN)=1161.470703, E(HF/6-31(+) $G^*$ )=-824.960277, E(CCSD/6-31(+) $G^*$ )=-827.387312

|   |           |           |           |
|---|-----------|-----------|-----------|
| N | -2.072256 | 1.105980  | -0.071103 |
| C | -2.059504 | 0.589911  | -1.337439 |
| H | -2.367357 | 1.268570  | -2.118682 |
| C | -1.681094 | -0.681127 | -1.585525 |
| H | -1.672908 | -1.080128 | -2.585041 |
| C | -1.230666 | -1.524219 | -0.493625 |
| O | -0.782296 | -2.655801 | -0.599081 |
| N | -1.330922 | -0.910847 | 0.761600  |
| H | -0.977606 | -1.439511 | 1.550335  |
| C | -1.669186 | 0.398162  | 1.045691  |
| O | -1.609958 | 0.888541  | 2.156770  |
| H | -2.242063 | 2.086718  | 0.083778  |
| N | 2.072256  | -1.105980 | -0.071103 |
| C | 2.059504  | -0.589911 | -1.337439 |
| H | 2.367357  | -1.268570 | -2.118682 |
| C | 1.681094  | 0.681127  | -1.585525 |
| H | 1.672908  | 1.080128  | -2.585041 |
| C | 1.230666  | 1.524219  | -0.493625 |
| O | 0.782296  | 2.655801  | -0.599081 |
| N | 1.330922  | 0.910847  | 0.761600  |
| H | 0.977606  | 1.439511  | 1.550335  |
| C | 1.669186  | -0.398162 | 1.045691  |
| O | 1.609958  | -0.888541 | 2.156770  |
| H | 2.242063  | -2.086718 | 0.083778  |

Stacked uracil dimer, the cation geometry

E(NN)=1152.637409, E(HF/6-31(+) $G^*$ )=-824.933002, E(CCSD/6-31(+) $G^*$ )=-827.352475

|   |           |           |           |
|---|-----------|-----------|-----------|
| N | 1.444053  | 1.105646  | -0.823447 |
| H | 1.262853  | 1.632814  | -1.662002 |
| C | 2.363500  | 0.097169  | -0.944097 |
| O | 2.921317  | -0.206549 | -1.941200 |
| C | 0.757351  | 1.484087  | 0.317679  |
| O | -0.070474 | 2.348460  | 0.296920  |
| N | 2.604736  | -0.589913 | 0.263726  |
| H | 3.259739  | -1.350492 | 0.186024  |
| C | 2.040503  | -0.287749 | 1.419215  |
| H | 2.346338  | -0.866403 | 2.273578  |
| C | 1.097947  | 0.710321  | 1.509375  |
| H | 0.768243  | 1.074880  | 2.461650  |
| C | -1.097947 | -0.710321 | 1.509376  |
| H | -0.768243 | -1.074879 | 2.461650  |
| C | -2.040503 | 0.287749  | 1.419215  |
| H | -2.346338 | 0.866404  | 2.273578  |
| N | -2.604736 | 0.589913  | 0.263726  |

Electronic Supplementary Material for PCCP  
This journal is © The Owner Societies 2009

|   |           |           |           |
|---|-----------|-----------|-----------|
| H | -3.259739 | 1.350492  | 0.186024  |
| C | -2.363500 | -0.097169 | -0.944097 |
| O | -2.921317 | 0.206549  | -1.941200 |
| N | -1.444053 | -1.105646 | -0.823447 |
| H | -1.262853 | -1.632814 | -1.662001 |
| C | -0.757351 | -1.484087 | 0.317679  |
| O | 0.070474  | -2.348460 | 0.296920  |

H-bonded uracil dimer, the geometry of the neutral

$E(\text{NN})=1032.281916$ ,  $E(\text{HF}/6-31(+)\text{G}^*)=-824.983139$ ,  $E(\text{CCSD}/6-31(+)\text{G}^*)=-827.399595$

|   |           |           |          |
|---|-----------|-----------|----------|
| O | -0.999831 | -1.474772 | 0.000000 |
| C | -1.908930 | -0.644185 | 0.000000 |
| N | -1.694255 | 0.706319  | 0.000000 |
| C | -2.718913 | 1.613974  | 0.000000 |
| C | -4.016749 | 1.243246  | 0.000000 |
| C | -4.360922 | -0.165195 | 0.000000 |
| N | -3.231326 | -1.004870 | 0.000000 |
| O | -5.481203 | -0.643233 | 0.000000 |
| H | -4.810563 | 1.970059  | 0.000000 |
| H | -0.714742 | 1.017291  | 0.000000 |
| H | -3.415735 | -1.998756 | 0.000000 |
| H | -2.410651 | 2.648930  | 0.000000 |
| O | 0.999831  | 1.474772  | 0.000000 |
| C | 1.908930  | 0.644185  | 0.000000 |
| N | 1.694255  | -0.706319 | 0.000000 |
| C | 2.718913  | -1.613974 | 0.000000 |
| C | 4.016749  | -1.243246 | 0.000000 |
| C | 4.360922  | 0.165195  | 0.000000 |
| N | 3.231326  | 1.004870  | 0.000000 |
| O | 5.481203  | 0.643233  | 0.000000 |
| H | 4.810563  | -1.970059 | 0.000000 |
| H | 0.714742  | -1.017291 | 0.000000 |
| H | 3.415735  | 1.998756  | 0.000000 |
| H | 2.410651  | -2.648930 | 0.000000 |
